# Supplementary material for: High costs of capital hinder the equity, speed and abatement potential of solar and wind deployment globally
Source: Research Square preprint supplement (doi:10.21203/rs.3.rs-6620411/v1), 2025-05-12
Supplement: Supplementary file 1 [file fbcc991f5db824c42da66d0c.xlsx]

## Sheet: Estimated WACCS 2024
Country	Country code	Technology	WACC 2024 (%)
Albania	ALB	Solar	12.9
Albania	ALB	Onshore Wind	13.2
Albania	ALB	Offshore Wind	14.1
Algeria	DZA	Solar	11.2
Algeria	DZA	Onshore Wind	11.5
Algeria	DZA	Offshore Wind	12.3
Andorra (Principality of)	AND	Solar	11.2
Andorra (Principality of)	AND	Onshore Wind	11.5
Andorra (Principality of)	AND	Offshore Wind	12.4
Angola	AGO	Solar	15.1
Angola	AGO	Onshore Wind	15.4
Angola	AGO	Offshore Wind	16.2
Argentina	ARG	Solar	20.7
Argentina	ARG	Onshore Wind	19.5
Argentina	ARG	Offshore Wind	21.1
Armenia	ARM	Solar	12.6
Armenia	ARM	Onshore Wind	12.9
Armenia	ARM	Offshore Wind	13.8
Aruba	ABW	Solar	10.7
Aruba	ABW	Onshore Wind	11
Aruba	ABW	Offshore Wind	11.8
Australia	AUS	Solar	6.6
Australia	AUS	Onshore Wind	6.8
Australia	AUS	Offshore Wind	7.6
Austria	AUT	Solar	7.4
Austria	AUT	Onshore Wind	7.7
Austria	AUT	Offshore Wind	8.5
Azerbaijan	AZE	Solar	11.2
Azerbaijan	AZE	Onshore Wind	11.5
Azerbaijan	AZE	Offshore Wind	12.4
Bahamas	BHS	Solar	15.4
Bahamas	BHS	Onshore Wind	15.7
Bahamas	BHS	Offshore Wind	16.7
Bahrain	BHR	Solar	16.6
Bahrain	BHR	Onshore Wind	16.9
Bahrain	BHR	Offshore Wind	17.9
Bangladesh	BGD	Solar	13.8
Bangladesh	BGD	Onshore Wind	14
Bangladesh	BGD	Offshore Wind	14.8
Barbados	BRB	Solar	16.8
Barbados	BRB	Onshore Wind	17.1
Barbados	BRB	Offshore Wind	18.1
Belarus	BLR	Solar	29.6
Belarus	BLR	Onshore Wind	29.9
Belarus	BLR	Offshore Wind	30.8
Belgium	BEL	Solar	7.4
Belgium	BEL	Onshore Wind	7.7
Belgium	BEL	Offshore Wind	8.5
Belize	BLZ	Solar	19
Belize	BLZ	Onshore Wind	19.3
Belize	BLZ	Offshore Wind	20.3
Benin	BEN	Solar	12.4
Benin	BEN	Onshore Wind	12.7
Benin	BEN	Offshore Wind	13.5
Bermuda	BMU	Solar	11.2
Bermuda	BMU	Onshore Wind	11.5
Bermuda	BMU	Offshore Wind	12.5
Bolivia	BOL	Solar	19.3
Bolivia	BOL	Onshore Wind	18.8
Bolivia	BOL	Offshore Wind	20.4
Bosnia and Herzegovina	BIH	Solar	16.7
Bosnia and Herzegovina	BIH	Onshore Wind	17
Bosnia and Herzegovina	BIH	Offshore Wind	18
Botswana	BWA	Solar	9.7
Botswana	BWA	Onshore Wind	10
Botswana	BWA	Offshore Wind	10.8
Brazil	BRA	Solar	8.6
Brazil	BRA	Onshore Wind	8.9
Brazil	BRA	Offshore Wind	9.6
Brunei	BRN	Solar	9.4
Brunei	BRN	Onshore Wind	9.7
Brunei	BRN	Offshore Wind	10.5
Bulgaria	BGR	Solar	9.5
Bulgaria	BGR	Onshore Wind	10.6
Bulgaria	BGR	Offshore Wind	12.4
Burkina Faso	BFA	Solar	16
Burkina Faso	BFA	Onshore Wind	16.3
Burkina Faso	BFA	Offshore Wind	17.1
Cambodia	KHM	Solar	14.5
Cambodia	KHM	Onshore Wind	14.8
Cambodia	KHM	Offshore Wind	15.7
Cameroon	CMR	Solar	15.4
Cameroon	CMR	Onshore Wind	15.7
Cameroon	CMR	Offshore Wind	16.5
Canada	CAN	Solar	8.2
Canada	CAN	Onshore Wind	7.8
Canada	CAN	Offshore Wind	8.5
Cape Verde	CPV	Solar	14.4
Cape Verde	CPV	Onshore Wind	14.7
Cape Verde	CPV	Offshore Wind	15.5
Cayman Islands	CYM	Solar	10.9
Cayman Islands	CYM	Onshore Wind	11.2
Cayman Islands	CYM	Offshore Wind	12.2
Chile	CHL	Solar	7.6
Chile	CHL	Onshore Wind	7.8
Chile	CHL	Offshore Wind	8.6
China	CHN	Solar	7.6
China	CHN	Onshore Wind	7.8
China	CHN	Offshore Wind	9.3
Colombia	COL	Solar	9.3
Colombia	COL	Onshore Wind	9.5
Colombia	COL	Offshore Wind	10.3
Congo (Democratic Republic of)	COD	Solar	14.6
Congo (Democratic Republic of)	COD	Onshore Wind	14.9
Congo (Democratic Republic of)	COD	Offshore Wind	15.7
Congo (Republic of)	COG	Solar	17.7
Congo (Republic of)	COG	Onshore Wind	18
Congo (Republic of)	COG	Offshore Wind	18.9
Cook Islands	COK	Solar	13.4
Cook Islands	COK	Onshore Wind	13.7
Cook Islands	COK	Offshore Wind	14.6
Costa Rica	CRI	Solar	11.4
Costa Rica	CRI	Onshore Wind	10.3
Costa Rica	CRI	Offshore Wind	11.1
Croatia	HRV	Solar	10
Croatia	HRV	Onshore Wind	8.8
Croatia	HRV	Offshore Wind	9.7
Cuba	CUB	Solar	20.7
Cuba	CUB	Onshore Wind	21
Cuba	CUB	Offshore Wind	21.8
Curacao	CUW	Solar	10.7
Curacao	CUW	Onshore Wind	11
Curacao	CUW	Offshore Wind	11.8
Cyprus	CYP	Solar	8.9
Cyprus	CYP	Onshore Wind	10
Cyprus	CYP	Offshore Wind	11.7
Czech Republic	CZE	Solar	8.4
Czech Republic	CZE	Onshore Wind	9.5
Czech Republic	CZE	Offshore Wind	10.3
C√¥te d'Ivoire	CIV	Solar	11.3
C√¥te d'Ivoire	CIV	Onshore Wind	11.6
C√¥te d'Ivoire	CIV	Offshore Wind	12.4
Denmark	DNK	Solar	7.1
Denmark	DNK	Onshore Wind	7.3
Denmark	DNK	Offshore Wind	8.2
Dominican Republic	DOM	Solar	11.7
Dominican Republic	DOM	Onshore Wind	12
Dominican Republic	DOM	Offshore Wind	12.8
Ecuador	ECU	Solar	19.3
Ecuador	ECU	Onshore Wind	19.6
Ecuador	ECU	Offshore Wind	20.4
Egypt	EGY	Solar	16.6
Egypt	EGY	Onshore Wind	16.8
Egypt	EGY	Offshore Wind	17.7
El Salvador	SLV	Solar	13.2
El Salvador	SLV	Onshore Wind	14.9
El Salvador	SLV	Offshore Wind	15.7
Estonia	EST	Solar	7.9
Estonia	EST	Onshore Wind	8.2
Estonia	EST	Offshore Wind	9
Ethiopia	ETH	Solar	17.5
Ethiopia	ETH	Onshore Wind	17.8
Ethiopia	ETH	Offshore Wind	18.6
Fiji	FJI	Solar	12.9
Fiji	FJI	Onshore Wind	13.2
Fiji	FJI	Offshore Wind	14
Finland	FIN	Solar	9.1
Finland	FIN	Onshore Wind	7.9
Finland	FIN	Offshore Wind	8.7
France	FRA	Solar	8.1
France	FRA	Onshore Wind	7.7
France	FRA	Offshore Wind	9.2
Gabon	GAB	Solar	17.5
Gabon	GAB	Onshore Wind	17.8
Gabon	GAB	Offshore Wind	18.6
Gambia	GMB	Solar	12.7
Gambia	GMB	Onshore Wind	13
Gambia	GMB	Offshore Wind	13.8
Georgia	GEO	Solar	12.2
Georgia	GEO	Onshore Wind	12.5
Georgia	GEO	Offshore Wind	13.4
Germany	DEU	Solar	6.6
Germany	DEU	Onshore Wind	6.8
Germany	DEU	Offshore Wind	7.6
Ghana	GHA	Solar	18.1
Ghana	GHA	Onshore Wind	18.4
Ghana	GHA	Offshore Wind	19.2
Greece	GRC	Solar	9.6
Greece	GRC	Onshore Wind	9.9
Greece	GRC	Offshore Wind	10.7
Guatemala	GTM	Solar	10.8
Guatemala	GTM	Onshore Wind	11
Guatemala	GTM	Offshore Wind	11.9
Guernsey (States of)	GGY	Solar	11
Guernsey (States of)	GGY	Onshore Wind	11.3
Guernsey (States of)	GGY	Offshore Wind	12.3
Guinea	GIN	Solar	18.1
Guinea	GIN	Onshore Wind	18.4
Guinea	GIN	Offshore Wind	19.2
Guinea-Bissau	GNB	Solar	15.1
Guinea-Bissau	GNB	Onshore Wind	15.4
Guinea-Bissau	GNB	Offshore Wind	16.2
Guyana	GUY	Solar	9.8
Guyana	GUY	Onshore Wind	10.1
Guyana	GUY	Offshore Wind	10.9
Haiti	HTI	Solar	21.2
Haiti	HTI	Onshore Wind	21.5
Haiti	HTI	Offshore Wind	22.4
Honduras	HND	Solar	12.4
Honduras	HND	Onshore Wind	12.7
Honduras	HND	Offshore Wind	13.5
Hong Kong	HKG	Solar	9.5
Hong Kong	HKG	Onshore Wind	9.8
Hong Kong	HKG	Offshore Wind	10.7
Hungary	HUN	Solar	9.9
Hungary	HUN	Onshore Wind	11.9
Hungary	HUN	Offshore Wind	12.8
Iceland	ISL	Solar	9.3
Iceland	ISL	Onshore Wind	9.6
Iceland	ISL	Offshore Wind	10.4
India	IND	Solar	9.3
India	IND	Onshore Wind	9.6
India	IND	Offshore Wind	11
Indonesia	IDN	Solar	10.4
Indonesia	IDN	Onshore Wind	10.7
Indonesia	IDN	Offshore Wind	11.5
Iran	IRN	Solar	15.1
Iran	IRN	Onshore Wind	15.4
Iran	IRN	Offshore Wind	16.2
Iraq	IRQ	Solar	17.4
Iraq	IRQ	Onshore Wind	17.7
Iraq	IRQ	Offshore Wind	18.6
Ireland	IRL	Solar	9.9
Ireland	IRL	Onshore Wind	8.6
Ireland	IRL	Offshore Wind	9.5
Isle of Man	IMN	Solar	10.9
Isle of Man	IMN	Onshore Wind	11.2
Isle of Man	IMN	Offshore Wind	12.2
Israel	ISR	Solar	10
Israel	ISR	Onshore Wind	10.3
Israel	ISR	Offshore Wind	11.1
Italy	ITA	Solar	8.8
Italy	ITA	Onshore Wind	9.1
Italy	ITA	Offshore Wind	10.6
Jamaica	JAM	Solar	12.9
Jamaica	JAM	Onshore Wind	13.2
Jamaica	JAM	Offshore Wind	14
Japan	JPN	Solar	7.2
Japan	JPN	Onshore Wind	8.8
Japan	JPN	Offshore Wind	9.6
Jersey (States of)	JEY	Solar	10.8
Jersey (States of)	JEY	Onshore Wind	11.1
Jersey (States of)	JEY	Offshore Wind	12.1
Jordan	JOR	Solar	12.4
Jordan	JOR	Onshore Wind	12.7
Jordan	JOR	Offshore Wind	13.6
Kazakhstan	KAZ	Solar	10.3
Kazakhstan	KAZ	Onshore Wind	9.8
Kazakhstan	KAZ	Offshore Wind	11.4
Kenya	KEN	Solar	15
Kenya	KEN	Onshore Wind	14.6
Kenya	KEN	Offshore Wind	15.4
Korea	KOR	Solar	7.9
Korea	KOR	Onshore Wind	8.9
Korea	KOR	Offshore Wind	9.7
Korea, D.P.R.	PRK	Solar	24.7
Korea, D.P.R.	PRK	Onshore Wind	25
Korea, D.P.R.	PRK	Offshore Wind	26
Kuwait	KWT	Solar	9.8
Kuwait	KWT	Onshore Wind	10.1
Kuwait	KWT	Offshore Wind	11
Kyrgyzstan	KGZ	Solar	16.7
Kyrgyzstan	KGZ	Onshore Wind	17
Kyrgyzstan	KGZ	Offshore Wind	18
Laos	LAO	Solar	19.9
Laos	LAO	Onshore Wind	20.2
Laos	LAO	Offshore Wind	21
Latvia	LVA	Solar	9.9
Latvia	LVA	Onshore Wind	9.4
Latvia	LVA	Offshore Wind	11
Lebanon	LBN	Solar	30.4
Lebanon	LBN	Onshore Wind	30.8
Lebanon	LBN	Offshore Wind	31.7
Liberia	LBR	Solar	18.1
Liberia	LBR	Onshore Wind	18.4
Liberia	LBR	Offshore Wind	19.2
Libya	LBY	Solar	10.3
Libya	LBY	Onshore Wind	10.6
Libya	LBY	Offshore Wind	11.4
Liechtenstein	LIE	Solar	9.2
Liechtenstein	LIE	Onshore Wind	9.6
Liechtenstein	LIE	Offshore Wind	10.4
Lithuania	LTU	Solar	8.4
Lithuania	LTU	Onshore Wind	8.7
Lithuania	LTU	Offshore Wind	9.6
Luxembourg	LUX	Solar	6.9
Luxembourg	LUX	Onshore Wind	7.1
Luxembourg	LUX	Offshore Wind	7.9
Macao	MAC	Solar	9.9
Macao	MAC	Onshore Wind	10.2
Macao	MAC	Offshore Wind	11.1
Macedonia	MKD	Solar	12.6
Macedonia	MKD	Onshore Wind	13.7
Macedonia	MKD	Offshore Wind	14.6
Madagascar	MDG	Solar	14.5
Madagascar	MDG	Onshore Wind	14.8
Madagascar	MDG	Offshore Wind	15.7
Malawi	MWI	Solar	17.5
Malawi	MWI	Onshore Wind	17.8
Malawi	MWI	Offshore Wind	18.6
Malaysia	MYS	Solar	9.5
Malaysia	MYS	Onshore Wind	9.8
Malaysia	MYS	Offshore Wind	10.6
Maldives	MDV	Solar	19.2
Maldives	MDV	Onshore Wind	19.5
Maldives	MDV	Offshore Wind	20.4
Mali	MLI	Solar	17.5
Mali	MLI	Onshore Wind	17.8
Mali	MLI	Offshore Wind	18.6
Malta	MLT	Solar	7
Malta	MLT	Onshore Wind	8.5
Malta	MLT	Offshore Wind	9.2
Mauritius	MUS	Solar	11.4
Mauritius	MUS	Onshore Wind	11.7
Mauritius	MUS	Offshore Wind	12.5
Mexico	MEX	Solar	9
Mexico	MEX	Onshore Wind	9.3
Mexico	MEX	Offshore Wind	10.1
Moldova	MDA	Solar	16.5
Moldova	MDA	Onshore Wind	16.8
Moldova	MDA	Offshore Wind	17.7
Mongolia	MNG	Solar	14
Mongolia	MNG	Onshore Wind	12.8
Mongolia	MNG	Offshore Wind	14.4
Montenegro	MNE	Solar	13.9
Montenegro	MNE	Onshore Wind	12.6
Montenegro	MNE	Offshore Wind	14.3
Montserrat	MSR	Solar	10
Montserrat	MSR	Onshore Wind	10.3
Montserrat	MSR	Offshore Wind	11
Morocco	MAR	Solar	9.4
Morocco	MAR	Onshore Wind	9
Morocco	MAR	Offshore Wind	9.7
Mozambique	MOZ	Solar	17.3
Mozambique	MOZ	Onshore Wind	17.6
Mozambique	MOZ	Offshore Wind	18.4
Myanmar	MMR	Solar	19.6
Myanmar	MMR	Onshore Wind	19.9
Myanmar	MMR	Offshore Wind	20.8
Namibia	NAM	Solar	12.2
Namibia	NAM	Onshore Wind	12.5
Namibia	NAM	Offshore Wind	13.2
Netherlands	NLD	Solar	6.8
Netherlands	NLD	Onshore Wind	7.1
Netherlands	NLD	Offshore Wind	7.9
New Zealand	NZL	Solar	8
New Zealand	NZL	Onshore Wind	6.9
New Zealand	NZL	Offshore Wind	8.4
Nicaragua	NIC	Solar	13.5
Nicaragua	NIC	Onshore Wind	13.8
Nicaragua	NIC	Offshore Wind	14.6
Niger	NER	Solar	18.7
Niger	NER	Onshore Wind	19
Niger	NER	Offshore Wind	19.8
Nigeria	NGA	Solar	15.7
Nigeria	NGA	Onshore Wind	16
Nigeria	NGA	Offshore Wind	16.8
Norway	NOR	Solar	8.5
Norway	NOR	Onshore Wind	7.3
Norway	NOR	Offshore Wind	8.9
Oman	OMN	Solar	11.7
Oman	OMN	Onshore Wind	12
Oman	OMN	Offshore Wind	12.9
Pakistan	PAK	Solar	17.6
Pakistan	PAK	Onshore Wind	17.9
Pakistan	PAK	Offshore Wind	18.7
Panama	PAN	Solar	10.5
Panama	PAN	Onshore Wind	10.7
Panama	PAN	Offshore Wind	11.6
Papua New Guinea	PNG	Solar	13.5
Papua New Guinea	PNG	Onshore Wind	13.8
Papua New Guinea	PNG	Offshore Wind	14.6
Paraguay	PRY	Solar	11.8
Paraguay	PRY	Onshore Wind	12.1
Paraguay	PRY	Offshore Wind	13
Peru	PER	Solar	9.5
Peru	PER	Onshore Wind	9
Peru	PER	Offshore Wind	10.5
Philippines	PHL	Solar	10.2
Philippines	PHL	Onshore Wind	10.4
Philippines	PHL	Offshore Wind	11.2
Poland	POL	Solar	8.1
Poland	POL	Onshore Wind	8.4
Poland	POL	Offshore Wind	9.2
Portugal	PRT	Solar	7.6
Portugal	PRT	Onshore Wind	7.8
Portugal	PRT	Offshore Wind	8.6
Qatar	QAT	Solar	10
Qatar	QAT	Onshore Wind	10.3
Qatar	QAT	Offshore Wind	11.2
Ras Al Khaimah (Emirate of)	RAK	Solar	11.6
Ras Al Khaimah (Emirate of)	RAK	Onshore Wind	11.9
Ras Al Khaimah (Emirate of)	RAK	Offshore Wind	12.9
Romania	ROU	Solar	10.5
Romania	ROU	Onshore Wind	10
Romania	ROU	Offshore Wind	10.9
Russia	RUS	Solar	11.8
Russia	RUS	Onshore Wind	12.1
Russia	RUS	Offshore Wind	12.9
Rwanda	RWA	Solar	13.7
Rwanda	RWA	Onshore Wind	14
Rwanda	RWA	Offshore Wind	14.8
Saudi Arabia	SAU	Solar	9.3
Saudi Arabia	SAU	Onshore Wind	9.5
Saudi Arabia	SAU	Offshore Wind	10.4
Senegal	SEN	Solar	12.4
Senegal	SEN	Onshore Wind	12.7
Senegal	SEN	Offshore Wind	13.5
Serbia	SRB	Solar	12.2
Serbia	SRB	Onshore Wind	12.5
Serbia	SRB	Offshore Wind	13.4
Sharjah	SHJ	Solar	13
Sharjah	SHJ	Onshore Wind	13.4
Sharjah	SHJ	Offshore Wind	14.4
Sierra Leone	SLE	Solar	18.1
Sierra Leone	SLE	Onshore Wind	18.4
Sierra Leone	SLE	Offshore Wind	19.2
Singapore	SGP	Solar	8.9
Singapore	SGP	Onshore Wind	9.2
Singapore	SGP	Offshore Wind	10
Slovakia	SVK	Solar	9.8
Slovakia	SVK	Onshore Wind	10.1
Slovakia	SVK	Offshore Wind	10.9
Slovenia	SVN	Solar	9
Slovenia	SVN	Onshore Wind	10
Slovenia	SVN	Offshore Wind	10.8
Solomon Islands	SLB	Solar	15.7
Solomon Islands	SLB	Onshore Wind	16
Solomon Islands	SLB	Offshore Wind	16.8
Somalia	SOM	Solar	22.1
Somalia	SOM	Onshore Wind	22.5
Somalia	SOM	Offshore Wind	23.5
South Africa	ZAF	Solar	9.7
South Africa	ZAF	Onshore Wind	10.7
South Africa	ZAF	Offshore Wind	11.5
Spain	ESP	Solar	8.4
Spain	ESP	Onshore Wind	8.7
Spain	ESP	Offshore Wind	9.5
Sri Lanka	LKA	Solar	21.2
Sri Lanka	LKA	Onshore Wind	21.5
Sri Lanka	LKA	Offshore Wind	22.4
St. Maarten	SXM	Solar	10.4
St. Maarten	SXM	Onshore Wind	10.7
St. Maarten	SXM	Offshore Wind	11.4
St. Vincent & the Grenadines	VCT	Solar	14.8
St. Vincent & the Grenadines	VCT	Onshore Wind	15.1
St. Vincent & the Grenadines	VCT	Offshore Wind	15.9
Sudan	SDN	Solar	28.5
Sudan	SDN	Onshore Wind	28.8
Sudan	SDN	Offshore Wind	29.6
Suriname	SUR	Solar	15.1
Suriname	SUR	Onshore Wind	15.4
Suriname	SUR	Offshore Wind	16.1
Swaziland	SWZ	Solar	14
Swaziland	SWZ	Onshore Wind	14.3
Swaziland	SWZ	Offshore Wind	15.1
Sweden	SWE	Solar	8.6
Sweden	SWE	Onshore Wind	7.4
Sweden	SWE	Offshore Wind	8.3
Switzerland	CHE	Solar	8
Switzerland	CHE	Onshore Wind	9
Switzerland	CHE	Offshore Wind	9.8
Syria	SYR	Solar	29.6
Syria	SYR	Onshore Wind	29.9
Syria	SYR	Offshore Wind	30.8
Taiwan	TWN	Solar	8.5
Taiwan	TWN	Onshore Wind	9.5
Taiwan	TWN	Offshore Wind	10.4
Tajikistan	TJK	Solar	15.9
Tajikistan	TJK	Onshore Wind	16.2
Tajikistan	TJK	Offshore Wind	17
Tanzania	TZA	Solar	12.4
Tanzania	TZA	Onshore Wind	12.7
Tanzania	TZA	Offshore Wind	13.5
Thailand	THA	Solar	10.3
Thailand	THA	Onshore Wind	10.6
Thailand	THA	Offshore Wind	11.4
Togo	TGO	Solar	14.9
Togo	TGO	Onshore Wind	15.2
Togo	TGO	Offshore Wind	16
Trinidad and Tobago	TTO	Solar	10.8
Trinidad and Tobago	TTO	Onshore Wind	11.1
Trinidad and Tobago	TTO	Offshore Wind	11.9
Tunisia	TUN	Solar	19.2
Tunisia	TUN	Onshore Wind	19.5
Tunisia	TUN	Offshore Wind	20.4
Turkey	TUR	Solar	12.2
Turkey	TUR	Onshore Wind	11.7
Turkey	TUR	Offshore Wind	12.6
Turks and Caicos Islands	TCA	Solar	12
Turks and Caicos Islands	TCA	Onshore Wind	12.4
Turks and Caicos Islands	TCA	Offshore Wind	13.4
Uganda	UGA	Solar	14.6
Uganda	UGA	Onshore Wind	14.9
Uganda	UGA	Offshore Wind	15.7
Ukraine	UKR	Solar	22.6
Ukraine	UKR	Onshore Wind	22.9
Ukraine	UKR	Offshore Wind	23.8
United Arab Emirates	ARE	Solar	10
United Arab Emirates	ARE	Onshore Wind	10.4
United Arab Emirates	ARE	Offshore Wind	11.3
United Kingdom	GBR	Solar	8.2
United Kingdom	GBR	Onshore Wind	7.7
United Kingdom	GBR	Offshore Wind	8.5
United States	USA	Solar	7.5
United States	USA	Onshore Wind	7.1
United States	USA	Offshore Wind	7.9
Uruguay	URY	Solar	9.1
Uruguay	URY	Onshore Wind	8.7
Uruguay	URY	Offshore Wind	9.5
Uzbekistan	UZB	Solar	12.9
Uzbekistan	UZB	Onshore Wind	13.2
Uzbekistan	UZB	Offshore Wind	14.1
Venezuela	VEN	Solar	28.6
Venezuela	VEN	Onshore Wind	28.9
Venezuela	VEN	Offshore Wind	29.8
Vietnam	VNM	Solar	10.3
Vietnam	VNM	Onshore Wind	11.3
Vietnam	VNM	Offshore Wind	12.9
Yemen, Republic	YEM	Solar	22.4
Yemen, Republic	YEM	Onshore Wind	22.7
Yemen, Republic	YEM	Offshore Wind	23.6
Zambia	ZMB	Solar	17.5
Zambia	ZMB	Onshore Wind	17.8
Zambia	ZMB	Offshore Wind	18.6
Zimbabwe	ZWE	Solar	18.1
Zimbabwe	ZWE	Onshore Wind	18.4
Zimbabwe	ZWE	Offshore Wind	19.2

## Sheet: UNFCCC Annex II
Country	Country code
Australia	AUS
Austria	AUT
Belgium	BEL
Canada	CAN
Denmark	DNK
Finland	FIN
France	FRA
Germany	DEU
Greece	GRC
Iceland	ISL
Ireland	ARL
Italy	ITA
Japan	JPN
Luxembourg	LUX
Netherlands	NLD
New Zealand	NZL
Norway	NOR
Portugal	PRT
Spain	ESP
Sweden	SWE
Switzerland	CHE
Turkey	TUR
United Kingdom of Great Britain and Northern Ireland	GBR
United States of America	USA

## Sheet: Country-Region Mappings
Region	Region Code	Countries
Africa	AFR	Algeria, Angola, Benin, Botswana, Burkina Faso, Burundi, Cameroon, Cape Verde, Central African Republic, Chad, Comoros, Congo, Congo Republic, Djibouti, Egypt, Equatorial Guinea, Eswatini (Swaziland), Ethiopia, Gabon, Gambia, Ghana, Guinea, Guinea-Bissau, Ivory Coast, Kenya, Lesotho, Liberia, Libya, Madagascar, Malawi, Mali, Mauritania, Mauritius, Morocco, Mozambique, Namibia, Niger, Nigeria, Reu…
Australasia	AUS	Australia, New Zealand
Canada	CAN	Canada
China	CHN	China
Caribbean & South America	CSA	Antigua and Barbuda, Argentina, Bahamas, Barbados, Belize, Bermuda, Bolivia, Brazil, Cayman Islands, Chile, Colombia, Costa Rica, Cuba, Dominica, Dominican Republic, Ecuador, El Salvador, French Guiana, Grenada, Guadeloupe, Guatemala, Guyana, Haiti, Honduras, Jamaica, Martinique, Netherlands Antilles, Nicaragua, Panama, Paraguay, Peru, St. Kitts and Nevis, St. Lucia, St. Vincent and Grenadines, S…
Eastern Europe	EEU	Albania, Bosnia-Herzegovina, Bulgaria, Croatia, Czech Republic, Hungary, Montenegro, Poland, Romania, Slovakia, Slovenia
Former Soviet Union	FSU	Armenia, Azerbaijan, Belarus, Estonia, Georgia, Kazakhstan, Kyrgyzstan, Latvia, Lithuania, Moldova, Russia, Tajikistan, Turkmenistan, Ukraine, Uzbekistan
India	IND	India
Japan	JPN	Japan
Middle East	MEA	Bahrain, Cyprus, Iran, Iraq, Israel, Jordan, Kuwait, Lebanon, Oman, Qatar, Saudi Arabia, Syria, Turkey, United Arab Emirates, Yemen
Mexico	MEX	Mexico
Other Developing Asia	ODA	Afghanistan, Bangladesh, Bhutan, Brunei, Cambodia, Chinese Taipei, Cook Islands, Fiji, French Polynesia, Guam, Indonesia, Kiribati, Laos, Macau, Malaysia, Maldives, Mongolia, Myanmar, Nauru, Nepal, New Caledonia, Niue, North Korea, Pakistan, Papua-New Guinea, Philippines, Samoa, Singapore, Solomon Islands, Sri Lanka, Taiwan, Thailand, Vanuatu, Vietnam
South Korea	KOR	South Korea
United States	USA	United States
Western Europe	WEU	Austria, Belgium, Denmark, Finland, France, Germany, Gibraltar, Greece, Greenland, Iceland, Ireland, Italy, Liechtenstein, Luxembourg, Malta, Monaco, Netherlands, Norway, Portugal, San Marino, Spain, Sweden, Switzerland, United Kingdom, Vatican City

## Sheet: Land Use Availability Factors
ID	GlobCover global legend	Merged land use category	Solar PV land use factor	Wind land use factor
150	Sparse (>15%) vegetation (woody vegetation, shrubs, grassland)	Barren	0.1	0.9
200	Bare areas	Barren	0.1	0.9
14	Rainfed croplands	Cropland	0.5	0.6
20	Mosaic Cropland (50-70%) / Vegetation (grassland, shrubland, forest) (20-50%)	Cropland	0.5	0.6
11	Post-flooding or irrigated croplands	Cropland natural	0.1	0.7
30	Mosaic Vegetation (grassland, shrubland, forest) (50-70%) / Cropland (20-50%)	Cropland natural	0.1	0.7
40	Closed to open (>15%) broad-leaved evergreen and/or semi-deciduous forest (>5m)	Forest	0	0.1
50	Closed (>40%) broad-leaved deciduous forest (>5m)	Forest	0	0.1
60	Open (15-40%) broad-leaved deciduous forest (>5m)	Forest	0	0.1
70	Closed (>40%) needle-leaved evergreen forest (>5m)	Forest	0	0.1
90	Open (15-40%) needle-leaved deciduous or evergreen forest (>5m)	Forest	0	0.1
100	Closed to open (>15%) mixed broad-leaved and needle-leaved forest (>5m)	Forest	0	0.1
120	Mosaic Grassland (50-70%) / Forest/Shrubland (20-50%)	Grassland	0.1	0.9
140	Closed to open (>15%) grassland	Grassland	0.1	0.9
230	No Data	No data	0	0
110	Mosaic Forest/Shrubland (50-70%) / Grassland (20-50%)	Shrubland	0.05	0.5
130	Closed to open (>15%) shrubland (<5m)	Shrubland	0.05	0.5
220	Permanent snow and ice	Snow and ice	0	0
190	Artificial surfaces and associated areas (urban areas >50%)	Urban	0	1
160	Closed (>40%) broad-leaved forest regularly flooded - Fresh water	Water	0	1
170	Closed (>40%) broad-leaved semi-deciduous and/or evergreen forest regularly flooded - Saline water	Water	0	1
180	Closed to open (>15%) vegetation (grassland, shrubland, woody vegetation) on regularly flooded or waterlogged soil - Fresh, brackish or saline water	Water	0	1
210	Water bodies	Water	0	1

## Sheet: Regional Costs
	Onshore Wind (USD/kW)	Solar PV (USD/kW)	Offshore Wind (USD/kW)
Europe	1583	758	2800
Middle East	1715	758	2800
Other Asia	1160	758	2800
Central America & the Caribbean	1757	758	2800
Eurasia	1611	758	2800
Africa	1614	758	2800
Other South America	1563	758	2800
Other	1160	758	2800
Oceania	1610	758	2800
North America	1484	758	2800

## Sheet: National Costs
Country	Onshore Wind (USD/kW)	Solar PV (USD/kW)
Argentina		830
Austria		678
Australia		989
Belgium		965
Bulgaria		659
Brazil	1079	747.2
Canada	1420	1337
Chile		954
China	986	671
Cyprus		854
Czechia		663
Germany	1750	731
Denmark		1147.5
Estonia		705
Spain	1158	671
France	1746	955
United Kingdom	1273	933
Greece		626
Croatia		1226.1
Hungary		1078
Indonesia		798
Ireland		686
India		711
Italy	1369	821
Japan	2384	1875
Korea, Republic of		1205
Luxembourg		684
Latvia		716
Mexico	1577	1050
Netherlands		753
Poland		1049.6
Portugal		723
Romania		743
Russia Federation		1248
Saudi Arabia		794
Sweden	1535
Slovenia		965.4
Turkey	1434	715
United States	1501	1109
South Africa		1255
